# Supplementary material for: A review of validation strategies for computational drug repositioning
Source: PubMed Central journal article supplement — Brief Bioinform. 2016 Nov 22;19(1):174–7. doi: 10.1093/bib/bbw110 (PMC5862266; doi:10.1093/bib/bbw110), 2016-11-22
Supplement: bbw110_tables1.pdf [file bbw110_tables1.pdf]

| Title                                                                                                   | Authors                                                                             | Journal                 | Year | Validation Type | Label Type A    | Data Source A                                              | Data Source B | Data Source C |
|---------------------------------------------------------------------------------------------------------|-------------------------------------------------------------------------------------|-------------------------|------|-----------------|-----------------|------------------------------------------------------------|---------------|---------------|
| A large-scale computational approach to drug repositioning                                              | Li YY, An J, Jones SJ                                                               | Genome Inform           | 2006 | SV              | Indication      | DrugBank                                                   |               |               |
| Concept-based semi-automatic classification of drugs                                                    | Gurulingappa H, Kolárik C, Hofmann-Apitius M, Fluck J                               | J Chem Inf Model        | 2009 | SSV             | ATC Code        | KEGG BRITE                                                 |               |               |
| Systematic Evaluation of Drug-Disease Relationships to Identify Leads for Novel Drug Uses               | Annie P. Chiang and Atul J. Butte                                                   | Clin Pharm Therapeutics | 2009 | SV              | Clinical Trials | <a href="http://ClinicalTrials.gov">ClinicalTrials.gov</a> |               |               |
| PREDICT: a method for inferring novel drug indications with application to personalized medicine        | Gottlieb A, Stein GY, Ruppin E, Sharan R                                            | Mol Syst Biol           | 2011 | SSV             | Indication      | DrugBank                                                   | DailyMed      |               |
| Discovery and preclinical validation of drug indications using compendia of public gene expression data | Sirota M, Dudley JT, Kim J, Chiang AP, Morgan AA, Sweet-Cordero A, Sage J, Butte AJ | Sci Transl Med          | 2011 | CSV             |                 |                                                            |               |               |
| Drug                                                                                                    | Mathur S,                                                                           | AMIA Annu               | 2011 | SV              | Clinical Trials | <a href="http://ClinicalTrials.gov">ClinicalTrials.gov</a> |               |               |

|                                                                                                          |                                                                                                             |                                          |      |     |            |                   |  |  |
|----------------------------------------------------------------------------------------------------------|-------------------------------------------------------------------------------------------------------------|------------------------------------------|------|-----|------------|-------------------|--|--|
| Repositioning using Disease Associated Biological Processes and Network Analysis of Drug Targets         | Dinakarbandian D                                                                                            | Symp Proc                                |      |     |            | <a href="#">v</a> |  |  |
| Systematic drug repositioning based on clinical side-effects                                             | Yang L, Agarwal P                                                                                           | PLoS One                                 | 2011 | SSV | Indication | GeneGo Metabase   |  |  |
| A New Method for Computational Drug Repositioning Using Drug Pairwise Similarity                         | Li J, Lu Z                                                                                                  | IEEE Int Conf Bioinformatics Biomed Proc | 2012 | SSV | Indication | NDF-RT            |  |  |
| Rational drug repositioning guided by an integrated pharmacological network of protein, disease and drug | Lee HS, Bae T, Lee JH, Kim DG, Oh YS, Jang Y, Kim JT, Lee JJ, Innocenti A, Supuran CT, Chen L, Rho K, Kim S | BMC Syst Biol                            | 2012 | SSV | Indication | Drugs@FDA         |  |  |
| Multi-aspect candidates for repositioning: data fusion methods using heterogeneous                       | Arany Á, Bolgár B, Balogh B, Antal P, Mátyus P                                                              | Curr Med Chem                            | 2013 | SSV | ATC Codes  | DrugBank          |  |  |

|                                                                                                              |                                                                                      |                          |      |     |                             |            |          |     |
|--------------------------------------------------------------------------------------------------------------|--------------------------------------------------------------------------------------|--------------------------|------|-----|-----------------------------|------------|----------|-----|
| information sources                                                                                          |                                                                                      |                          |      |     |                             |            |          |     |
| Evaluation of analytical methods for connectivity map data                                                   | Cheng J, Xie Q, Kumar V, Hurle M, Freudenberg JM, Yang L, Agarwal P                  | Pac Symp Biocomput       | 2013 | SSV | ATC Codes                   | KEGG BRITE |          |     |
| Network predicting drug's anatomical therapeutic chemical code                                               | Wang YC, Chen SL, Deng NY, Wang Y                                                    | Bioinformatics           | 2013 | SSV | ATC Codes                   | KEGG BRITE | DrugBank |     |
| Generation and application of drug indication inference models using typed network motif comparison analysis | Choi J, Kim K, Song M, Lee D                                                         | BMC Med Inform Decis Mak | 2013 | SSV | Indication                  | CTD        |          |     |
| Drug target prediction and repositioning using an integrated network-based approach                          | Emig D, Ivliev A, Pustovalova O, Lancashire L, Bureeva S, Nikolsky Y, Bessarabova M. | PLoS One                 | 2013 | SSV | Disease Targets             | Integrity  |          |     |
| Inferring disease association using clinical factors in a combinatorial manner and their use in drug         | Jung J, Lee D                                                                        | Bioinformatics           | 2013 | SV  | Indication, Clinical Trials | DrugBank   | PharmGKB | TTD |

|                                                                                                               |                                           |                     |      |     |            |            |  |  |
|---------------------------------------------------------------------------------------------------------------|-------------------------------------------|---------------------|------|-----|------------|------------|--|--|
| repositioning                                                                                                 |                                           |                     |      |     |            |            |  |  |
| Drug repositioning for orphan genetic diseases through Conserved Anticoexpressed Gene Clusters (CAGCs)        | Molineris I, Ala U, Provero P, Di Cunto F | BMC Bioinformatics  | 2013 | CSV |            |            |  |  |
| Drug repositioning by kernel-based integration of molecular structure, molecular activity, and phenotype data | Wang Y, Chen S, Deng N, Wang Y            | PLoS One            | 2013 | SSV | Indication | DrugBank   |  |  |
| A hybrid method for prediction and repositioning of drug Anatomical Therapeutic Chemical classes              | Chen L, Lu J, Zhang N, Huang T, Cai YD    | Mol Biosyst         | 2014 | SSV | ATC Code   | KEGG BRITE |  |  |
| Exploring the relationship between drug side-effects and therapeutic indications                              | Zhang P, Wang F, Hu J, Sorrentino R       | AMIA Annu Symp Proc | 2013 | SSV | Indication | NDF-RT     |  |  |
| Pathway-based                                                                                                 | Li J, Lu Z                                | BMC                 | 2013 | SSV | Indication | CTD        |  |  |

|                                                                                                                                          |                                                                              |                    |      |     |                             |                   |  |  |
|------------------------------------------------------------------------------------------------------------------------------------------|------------------------------------------------------------------------------|--------------------|------|-----|-----------------------------|-------------------|--|--|
| drug repositioning using causal inference                                                                                                |                                                                              | Bioinformatics     |      |     |                             |                   |  |  |
| Drug repositioning by applying 'expression profiles' generated by integrating chemical structure similarity and gene semantic similarity | Tan F, Yang R, Xu X, Chen X, Wang Y, Ma H, Liu X, Wu X, Chen Y, Liu L, Jia X | Mol Biosyst        | 2014 | SSV | Indication                  | NLP of Literature |  |  |
| Computational drug repositioning through heterogeneous network clustering                                                                | Wu C, Gudivada RC, Aronow BJ, Jegga AG                                       | BMC Syst Biol      | 2013 | SSV | Indication, Clinical Trials | NLP of Literature |  |  |
| Exploring the associations between drug side-effects and therapeutic indications                                                         | Wang F, Zhang P, Cao N, Hu J, Sorrentino R                                   | J Biomed Inform    | 2014 | SSV | Indication                  | NDF-RT            |  |  |
| Exploiting large-scale drug-protein interaction                                                                                          | Liu R, Singh N, Tawa GJ, Wallqvist A, Reifman J                              | BMC Bioinformatics | 2014 | SV  | Indication                  | Various           |  |  |

|                                                                                                                                            |                                                          |                  |      |     |                 |                                                                                  |  |  |
|--------------------------------------------------------------------------------------------------------------------------------------------|----------------------------------------------------------|------------------|------|-----|-----------------|----------------------------------------------------------------------------------|--|--|
| information for computational drug repurposing                                                                                             |                                                          |                  |      |     |                 |                                                                                  |  |  |
| Drug-disease association and drug-repositioning predictions in complex diseases using causal inference-probabilistic matrix factorization. | Yang J, Li Z, Fan X, Cheng Y                             | J Chem Inf Model | 2014 | SSV | Indication      | CTD                                                                              |  |  |
| Inferring novel indications of approved drugs via a learning method with local and global consistency                                      | Yan Y, Shao X, Jiang Z                                   | PLoS One         | 2014 | SSV | Indication      | KEGG BRITE                                                                       |  |  |
| Prediction of drug gene associations via ontological profile similarity with application to drug repositioning                             | Kissa M, Tsatsaronis G, Schroeder M                      | Methods          | 2015 | SV  | Indication      | Drugs@FDA                                                                        |  |  |
| Repurpose terbutaline sulfate for amyotrophic                                                                                              | Paik H, Chung AY, Park HC, Park RW, Suk K, Kim J, Kim H, | Sci Rep          | 2015 | SV  | Clinical Trials | <a href="https://ClinicalTrials.gov">ClinicalTrials.gov</a><br><a href="#">y</a> |  |  |

|                                                                                                                              |                                                            |                         |      |     |                 |                                                                                 |  |  |
|------------------------------------------------------------------------------------------------------------------------------|------------------------------------------------------------|-------------------------|------|-----|-----------------|---------------------------------------------------------------------------------|--|--|
| lateral sclerosis using electronic medical records                                                                           | Lee K, Butte AJ.                                           |                         |      |     |                 |                                                                                 |  |  |
| Similarity-based prediction for Anatomical Therapeutic Chemical classification of drugs by integrating multiple data sources | Liu Z, Guo F, Gu J, Wang Y, Li Y, Wang D, Lu L, Li D, He F | Bioinformatics          | 2015 | SSV | ATC Code        | DrugBank                                                                        |  |  |
| DrugNet: network-based drug-disease prioritization by integrating heterogeneous data                                         | Martínez V, Navarro C, Cano C, Fajardo W, Blanco A         | Artif Intell Med        | 2015 | SSV | Clinical Trials | <a href="http://ClinicalTrials.gov">ClinicalTrials.gov</a><br><a href="#">v</a> |  |  |
| Prediction of drug indications based on chemical interactions and chemical similarities                                      | Huang G, Lu Y, Lu C, Zheng M, Cai YD                       | Biomed Res Int          | 2015 | SSV | Indication      | Comprehensive Medicinal Chemistry                                               |  |  |
| Network-based inference methods for drug repositioning                                                                       | Chen H, Zhang H, Zhang Z, Cao Y, Tang W                    | Comput Math Methods Med | 2015 | SSV | Indication      | DrugBank                                                                        |  |  |
| Inferring drug-disease                                                                                                       | Yu L, Huang J, Ma Z, Zhang J,                              | BMC Med Genomics        | 2015 | SV  | Indication      | CTD                                                                             |  |  |

|                                                                                                                   |                                                                                   |                    |      |     |            |            |          |     |
|-------------------------------------------------------------------------------------------------------------------|-----------------------------------------------------------------------------------|--------------------|------|-----|------------|------------|----------|-----|
| associations based on known protein complexes                                                                     | Zou Y, Gao L                                                                      |                    |      |     |            |            |          |     |
| DMAP: a connectivity map database to enable identification of novel drug repositioning candidates                 | Huang H, Nguyen T, Ibrahim S, Shantharam S, Yue Z, Chen JY                        | BMC Bioinformatics | 2015 | SSV | Indication | DrugBank   | DailyMed | TTD |
| Prediction of drug's Anatomical Therapeutic Chemical (ATC) code by integrating drug-domain network                | Chen FS, Jiang ZR                                                                 | J Biomed Inform    | 2015 | SSV | ATC Codes  | KEGG BRITE | DrugBank |     |
| A Semi-Supervised Approach for Refining Transcriptional Signatures of Drug Response and Repositioning Predictions | Iorio F, Shrestha RL, Levin N, Boilot V, Garnett MJ, Saez-Rodriguez J, Draviam VM | PLoS One           | 2015 | CSV |            |            |          |     |
| Computing Therapy for Precision                                                                                   | Regenbogen S, Wilkins AD, Lichtarge O                                             | Pac Symp Biocomput | 2016 | SSV | Indication | CTD        |          |     |



|                                                                                                                                                              |                                                                                                            |                       |      |     |            |                      |  |  |
|--------------------------------------------------------------------------------------------------------------------------------------------------------------|------------------------------------------------------------------------------------------------------------|-----------------------|------|-----|------------|----------------------|--|--|
| Medicine:<br>Collaborative<br>Filtering<br>Integrates and<br>Predicts Multi-<br>Entity<br>Interactions                                                       |                                                                                                            |                       |      |     |            |                      |  |  |
| DrugGenEx-Net:<br>a novel<br>computational<br>platform for<br>systems<br>pharmacology<br>and gene<br>expression-<br>based drug<br>repurposing                | Issa NT, Kruger<br>J, Wathieu H,<br>Raja R, Byers<br>SW,<br>Dakshanamurthy<br>S                            | BMC<br>Bioinformatics | 2016 | SV  | Indication | Literature<br>Review |  |  |
| Generating Gene<br>Ontology-<br>Disease<br>Inferences to<br>Explore<br>Mechanisms of<br>Human Disease<br>at the<br>Comparative<br>Toxicogenomics<br>Database | Davis AP,<br>Wiegers TC,<br>King BL, Wiegers<br>J, Grondin CJ,<br>Sciaky D,<br>Johnson RJ,<br>Mattingly CJ | PLoS One              | 2016 | CSV |            |                      |  |  |
